# Supplementary material for: CEL-Seq2: sensitive highly-multiplexed single-cell RNA-Seq
Source: Springer Nature journal article supplement (doi:10.1186/s13059-016-0938-8), 2016-04-27
Supplement: 13059_2016_938_MOESM3_ESM.pdf [file 13059_2016_938_MOESM3_ESM.pdf]

**Table S1. Cell capture and GFP+/- signal of cells on the Fluidigm C1.**

| cell position | barcode | # of cells | GFP      |
|---------------|---------|------------|----------|
| 1             | 33      | 1          | positive |
| 2             | 17      | 1          | positive |
| 3             | 1       | 1          | negative |
| 4             | 41      | 1          | negative |
| 5             | 25      | 1          | positive |
| 6             | 9       | 1          | negative |
| 7             | 34      | 1          | negative |
| 8             | 18      | 1          | positive |
| 9             | 2       | 2          | weak     |
| 10            | 42      | 1          | positive |
| 11            | 26      | 1          | negative |
| 12            | 10      | 1          | positive |
| 13            | 35      | 2          | mixed    |
| 14            | 19      | 1          | positive |
| 15            | 3       | 1          | negative |
| 16            | 43      | 2          | positive |
| 17            | 27      | 1          | negative |
| 18            | 11      | 1          | positive |
| 19            | 36      | 1          | negative |
| 20            | 20      | 2          | mixed    |
| 21            | 4       | 1          | ?        |
| 22            | 44      | ~10        | mixed    |
| 23            | 28      | 0          | n.a.     |
| 24            | 12      | 1          | positive |
| 25            | 5       | 3          | mixed    |
| 26            | 21      | 1          | positive |
| 27            | 37      | 2          | mixed    |

| cell position | barcode | # of cells | GFP      |
|---------------|---------|------------|----------|
| 49            | 1       | 1          | positive |
| 50            | 17      | 1          | positive |
| 51            | 33      | 1          | positive |
| 52            | 9       | 1          | negative |
| 53            | 25      | 1          | positive |
| 54            | 41      | 1          | positive |
| 55            | 2       | 1          | positive |
| 56            | 18      | 0          | n.a.     |
| 57            | 34      | 1          | negative |
| 58            | 10      | 1          | negative |
| 59            | 26      | 1          | positive |
| 60            | 42      | 1          | positive |
| 61            | 3       | 2          | positive |
| 62            | 19      | 1          | weak     |
| 63            | 35      | 2          | mixed    |
| 64            | 11      | 1          | positive |
| 65            | 27      | 3          | positive |
| 66            | 43      | 1          | positive |
| 67            | 4       | 1          | negative |
| 68            | 20      | 1          | positive |
| 69            | 36      | 1          | weak     |
| 70            | 12      | 2          | mixed    |
| 71            | 28      | 1          | positive |
| 72            | 44      | 1          | positive |
| 73            | 37      | 1          | weak     |
| 74            | 21      | 2          | mixed    |
| 75            | 5       | 2          | negative |

|    |    |   |          |
|----|----|---|----------|
| 28 | 13 | 0 | n.a.     |
| 29 | 29 | 1 | positive |
| 30 | 45 | 1 | weak     |
| 31 | 6  | 1 | positive |
| 32 | 22 | 1 | positive |
| 33 | 38 | 1 | positive |
| 34 | 14 | 1 | negative |
| 35 | 30 | 1 | negative |
| 36 | 46 | 2 | mixed    |
| 37 | 7  | 3 | mixed    |
| 38 | 23 | 1 | positive |
| 39 | 39 | 2 | mixed    |
| 40 | 15 | 1 | negative |
| 41 | 31 | 1 | negative |
| 42 | 47 | 2 | negative |
| 43 | 8  | 1 | positive |
| 44 | 24 | 1 | negative |
| 45 | 40 | 1 | negative |
| 46 | 16 | 1 | weak     |
| 47 | 32 | 2 | mixed    |
| 48 | 48 | 1 | negative |

|    |    |   |          |
|----|----|---|----------|
| 76 | 45 | 1 | positive |
| 77 | 29 | 2 | mixed    |
| 78 | 13 | 1 | negative |
| 79 | 38 | 1 | weak     |
| 80 | 22 | 1 | negative |
| 81 | 6  | 1 | weak     |
| 82 | 46 | 2 | mixed    |
| 83 | 30 | 1 | positive |
| 84 | 14 | 1 | negative |
| 85 | 39 | 1 | weak     |
| 86 | 23 | 1 | negative |
| 87 | 7  | 1 | negative |
| 88 | 47 | 2 | negative |
| 89 | 31 | 1 | negative |
| 90 | 15 | 1 | positive |
| 91 | 40 | 1 | negative |
| 92 | 24 | 1 | negative |
| 93 | 8  | 1 | negative |
| 94 | 48 | 1 | positive |
| 95 | 32 | 1 | positive |
| 96 | 16 | 1 | positive |
