# Supplementary material for: CEL-Seq2: sensitive highly-multiplexed single-cell RNA-Seq
Source: Springer Nature journal article supplement (doi:10.1186/s13059-016-0938-8), 2016-04-27
Supplement: 13059_2016_938_MOESM5_ESM.pdf [file 13059_2016_938_MOESM5_ESM.pdf]

**Table S2.** The sequences of the CEL-Seq primers. The 8 base barcodes are as previously published, the 6 base barcodes are listed in the detailed protocol.

|                      |                                                                                                                 |
|----------------------|-----------------------------------------------------------------------------------------------------------------|
| CEL-Seq              | CGATTGAGGCCGTAATACGACTCACTATAGGGGTTCA<br>GAGTTCTACAGTCCGACGATC[8 base<br>barcode]TTTTTTTTTTTTTTTTTTTTTTTTT      |
| CEL-Seq + UMI        | CGATTGAGGCCGTAATACGACTCACTATAGGGGTTCA<br>GAGTTCTACAGTCCGACGATCNNNNN[6 base<br>barcode]TTTTTTTTTTTTTTTTTTTTTTTTT |
| CEL-Seq2             | GCCGTAATACGACTCACTATAGGGAGTTCTACAGTCC<br>GACGATCNNNNNN[6 base<br>barcode]TTTTTTTTTTTTTTTTTTTTTTTTT              |
| Library RT<br>primer | GCCTTGGCACCCGAGAATTCCANNNNNN                                                                                    |
