# Supplementary material for: CEL-Seq2: sensitive highly-multiplexed single-cell RNA-Seq
Source: Springer Nature journal article supplement (doi:10.1186/s13059-016-0938-8), 2016-04-27

# Supplementary Figure 1

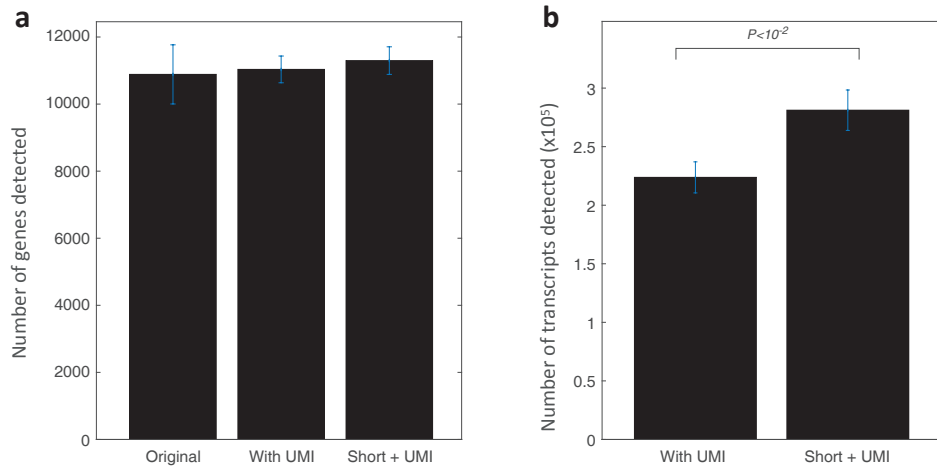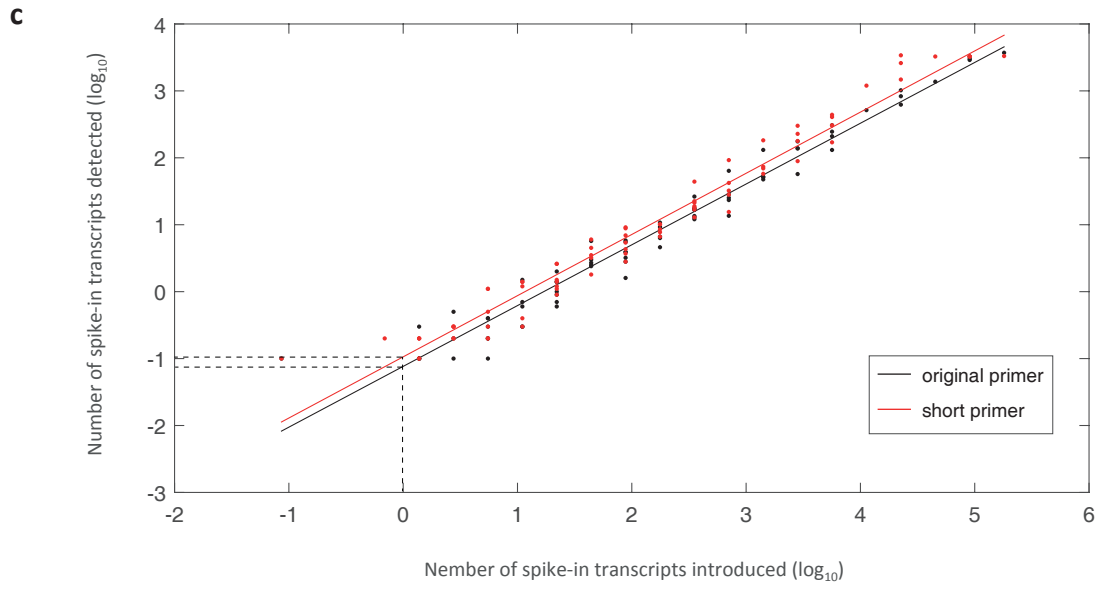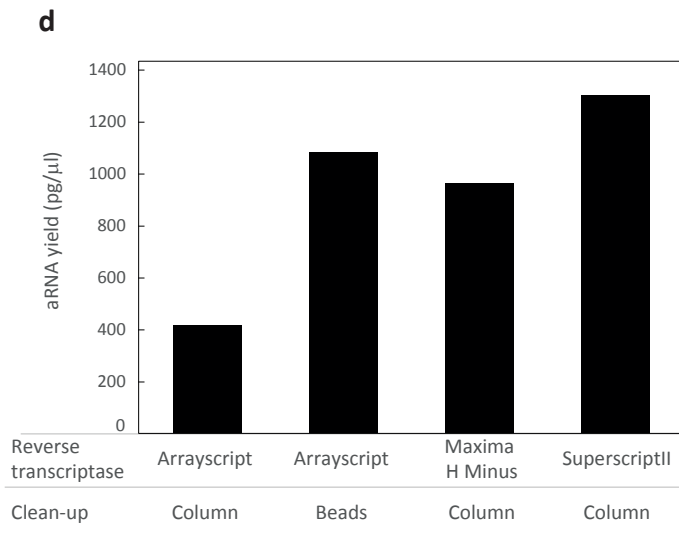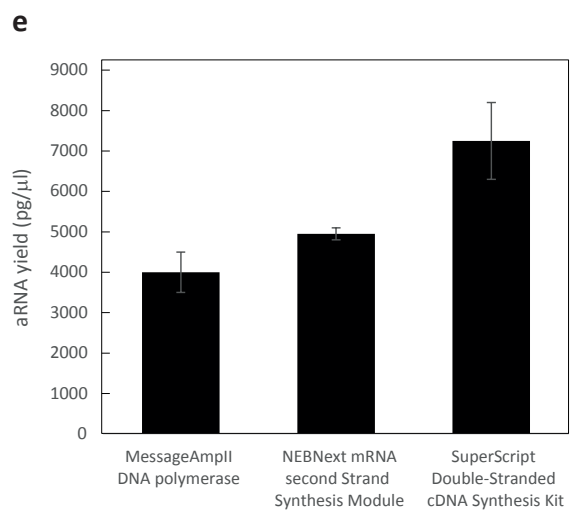

Supplement: MOESM1 [file 13059_2016_938_MOESM1_ESM.pdf]
